# Supplementary material
Source: PubMed Central journal article supplement (PMC3731916)
Supplement: CJN.11661112_CJN11661112SupplementaryData.pdf [file CJN.11661112_CJN11661112SupplementaryData.pdf]

**Supplementary Table 1. Relative risk of kidney stones according to categories of consumption of different beverages - cohort specific results**

**A. Health Professionals Follow-Up Study**

|                             | <1/week          | 1/week            | 2-4/week          | 5-6/week          | ≥1/day            | p-value trend |
|-----------------------------|------------------|-------------------|-------------------|-------------------|-------------------|---------------|
| <b>Regular cola</b>         |                  |                   |                   |                   |                   |               |
| Multivariate HR [95% CI]    | 1.00 (reference) | 1.00 [0.84, 1.20] | 1.19 [0.98, 1.45] | 1.19 [0.85, 1.67] | 0.97 [0.74, 1.26] | 0.47          |
| <b>Diet cola</b>            |                  |                   |                   |                   |                   |               |
| Multivariate HR [95% CI]    | 1.00 (reference) | 1.15 [0.95, 1.40] | 1.02 [0.84, 1.25] | 1.19 [0.87, 1.63] | 1.08 [0.89, 1.30] | 0.80          |
| <b>Regular non-cola</b>     |                  |                   |                   |                   |                   |               |
| Multivariate HR [95% CI]    | 1.00 (reference) | 1.34 [1.10, 1.63] | 1.21 [0.94, 1.56] | 1.51 [0.90, 2.53] | 1.00 [0.59, 1.67] | 0.11          |
| <b>Diet non-cola</b>        |                  |                   |                   |                   |                   |               |
| Multivariate HR [95% CI]    | 1.00 (reference) | 0.99 [0.79, 1.24] | 1.06 [0.83, 1.34] | 1.28 [0.86, 1.92] | 1.28 [0.93, 1.77] | 0.05          |
| <b>Coffee</b>               |                  |                   |                   |                   |                   |               |
| Multivariate HR [95% CI]    | 1.00 (reference) | 0.83 [0.62, 1.12] | 0.79 [0.62, 1.00] | 0.68 [0.50, 0.93] | 0.74 [0.65, 0.85] | <0.001        |
| <b>Decaffeinated coffee</b> |                  |                   |                   |                   |                   |               |
| Multivariate HR [95% CI]    | 1.00 (reference) | 0.94 [0.73, 1.21] | 1.13 [0.92, 1.38] | 0.70 [0.50, 1.00] | 0.77 [0.66, 0.90] | <0.001        |
| <b>Tea</b>                  |                  |                   |                   |                   |                   |               |
| Multivariate HR [95% CI]    | 1.00 (reference) | 1.16 [0.96, 1.41] | 1.13 [0.94, 1.37] | 1.17 [0.90, 1.53] | 0.88 [0.74, 1.04] | 0.36          |
| <b>Red wine</b>             |                  |                   |                   |                   |                   |               |
| Multivariate HR [95% CI]    | 1.00 (reference) | 1.02 [0.82, 1.27] | 0.74 [0.57, 1.00] | 1.13 [0.74, 1.72] | 0.64 [0.40, 1.02] | 0.08          |
| <b>White wine</b>           |                  |                   |                   |                   |                   |               |
| Multivariate HR [95% CI]    | 1.00 (reference) | 0.99 [0.81, 1.20] | 1.04 [0.84, 1.29] | 0.87 [0.57, 1.33] | 0.80 [0.53, 1.20] | 0.35          |
| <b>Beer</b>                 |                  |                   |                   |                   |                   |               |
| Multivariate HR [95% CI]    | 1.00 (reference) | 1.06 [0.88, 1.27] | 0.95 [0.79, 1.14] | 0.81 [0.57, 1.13] | 0.55 [0.40, 0.74] | <0.001        |
| <b>Liquor</b>               |                  |                   |                   |                   |                   |               |
| Multivariate HR [95% CI]    | 1.00 (reference) | 1.02 [0.83, 1.26] | 0.90 [0.74, 1.11] | 0.95 [0.70, 1.27] | 0.93 [0.75, 1.15] | 0.41          |
| <b>Apple juice</b>          |                  |                   |                   |                   |                   |               |
| Multivariate HR [95% CI]*   | 1.00 (reference) | 1.13 [0.94, 1.37] | 1.38 [1.12, 1.70] | 1.25 [0.80, 1.95] | 1.47 [1.01, 2.13] | 0.001         |
| <b>Grapefruit juice</b>     |                  |                   |                   |                   |                   |               |
| Multivariate HR [95% CI]*   | 1.00 (reference) | 1.20 [0.95, 1.51] | 1.05 [0.80, 1.38] | 1.34 [0.82, 2.20] | 1.05 [0.69, 1.60] | 0.35          |
| <b>Orange juice</b>         |                  |                   |                   |                   |                   |               |
| Multivariate HR [95% CI]*   | 1.00 (reference) | 1.23 [1.02, 1.47] | 1.00 [0.84, 1.19] | 0.95 [0.75, 1.21] | 1.13 [0.96, 1.32] | 0.32          |
| <b>Tomato juice</b>         |                  |                   |                   |                   |                   |               |
| Multivariate HR [95% CI]*   | 1.00 (reference) | 0.88 [0.72, 1.08] | 0.85 [0.63, 1.16] | 1.08 [0.55, 2.11] | 1.15 [0.67, 1.96] | 0.91          |
| <b>Other juice</b>          |                  |                   |                   |                   |                   |               |

|                            |                  |                   |                   |                   |                   |       |
|----------------------------|------------------|-------------------|-------------------|-------------------|-------------------|-------|
| Multivariate HR [95% CI]*  | 1.00 (reference) | 1.01 [0.83, 1.22] | 1.08 [0.88, 1.34] | 0.96 [0.64, 1.45] | 1.06 [0.79, 1.42] | 0.52  |
| <b>Punch</b>               |                  |                   |                   |                   |                   |       |
| Multivariate HR [95% CI]   | 1.00 (reference) | 1.02 [0.83, 1.25] | 1.32 [1.06, 1.64] | 1.41 [0.96, 2.05] | 1.23 [0.88, 1.71] | 0.006 |
| <b>Whole milk</b>          |                  |                   |                   |                   |                   |       |
| Multivariate HR [95% CI]** | 1.00 (reference) | 1.05 [0.74, 1.48] | 1.13 [0.85, 1.51] | 0.87 [0.48, 1.55] | 0.91 [0.65, 1.27] | 0.76  |
| <b>Skim milk</b>           |                  |                   |                   |                   |                   |       |
| Multivariate HR [95% CI]** | 1.00 (reference) | 0.89 [0.69, 1.15] | 0.97 [0.82, 1.15] | 1.00 [0.80, 1.25] | 0.87 [0.74, 1.03] | 0.23  |
| <b>Water</b>               |                  |                   |                   |                   |                   |       |
| Multivariate HR [95% CI]   | 1.00 (reference) | 0.97 [0.65, 1.45] | 0.95 [0.69, 1.30] | 1.13 [0.82, 1.55] | 1.01 [0.81, 1.27] | 0.77  |

Model adjusted for age, race, region of residence, BMI, use of furosemide, use of thiazides, high blood pressure, diabetes, gout, intake of calcium, potassium, phytate, animal protein, vitamin C, total calories, profession and mutually adjusted for all the beverages. \*No adjustment for potassium.

\*\*No adjustment for calcium.

## B. Nurses' Health Study I

|                             | <1/week          | 1/week            | 2-4/week          | 5-6/week          | ≥1/day            | p-value trend |
|-----------------------------|------------------|-------------------|-------------------|-------------------|-------------------|---------------|
| <b>Regular cola</b>         |                  |                   |                   |                   |                   |               |
| Multivariate HR [95% CI]    | 1.00 (reference) | 0.94 [0.76, 1.16] | 1.25 [0.99, 1.58] | 0.89 [0.53, 1.50] | 1.52 [1.18, 1.97] | 0.005         |
| <b>Diet cola</b>            |                  |                   |                   |                   |                   |               |
| Multivariate HR [95% CI]    | 1.00 (reference) | 1.06 [0.86, 1.29] | 1.15 [0.96, 1.38] | 1.00 [0.73, 1.35] | 0.81 [0.68, 0.97] | 0.02          |
| <b>Regular non-cola</b>     |                  |                   |                   |                   |                   |               |
| Multivariate HR [95% CI]    | 1.00 (reference) | 0.97 [0.75, 1.26] | 1.15 [0.84, 1.57] | 1.00 [0.47, 2.13] | 1.20 [0.72, 2.00] | 0.38          |
| <b>Diet non-cola</b>        |                  |                   |                   |                   |                   |               |
| Multivariate HR [95% CI]    | 1.00 (reference) | 0.84 [0.67, 1.06] | 1.28 [1.06, 1.56] | 0.62 [0.38, 1.00] | 1.31 [1.03, 1.67] | 0.07          |
| <b>Coffee</b>               |                  |                   |                   |                   |                   |               |
| Multivariate HR [95% CI]    | 1.00 (reference) | 0.93 [0.67, 1.30] | 1.00 [0.78, 1.29] | 0.79 [0.55, 1.12] | 0.79 [0.70, 0.89] | <0.001        |
| <b>Decaffeinated coffee</b> |                  |                   |                   |                   |                   |               |
| Multivariate HR [95% CI]    | 1.00 (reference) | 0.96 [0.73, 1.25] | 0.87 [0.69, 1.10] | 0.93 [0.67, 1.30] | 0.88 [0.77, 1.01] | 0.13          |
| <b>Tea</b>                  |                  |                   |                   |                   |                   |               |
| Multivariate HR [95% CI]    | 1.00 (reference) | 1.21 [1.01, 1.46] | 0.99 [0.82, 1.19] | 1.16 [0.88, 1.52] | 0.85 [0.74, 0.98] | 0.04          |
| <b>Red wine</b>             |                  |                   |                   |                   |                   |               |
| Multivariate HR [95% CI]    | 1.00 (reference) | 1.04 [0.79, 1.38] | 0.99 [0.72, 1.35] | 0.20 [0.05, 0.80] | 0.74 [0.43, 1.26] | 0.04          |
| <b>White wine</b>           |                  |                   |                   |                   |                   |               |
| Multivariate HR [95% CI]    | 1.00 (reference) | 1.02 [0.82, 1.26] | 0.75 [0.58, 1.00] | 0.65 [0.39, 1.07] | 0.65 [0.45, 0.93] | 0.001         |
| <b>Beer</b>                 |                  |                   |                   |                   |                   |               |
| Multivariate HR [95% CI]    | 1.00 (reference) | 1.11 [0.82, 1.51] | 0.70 [0.44, 1.10] | 0.83 [0.37, 1.85] | 0.63 [0.34, 1.19] | 0.07          |
| <b>Liquor</b>               |                  |                   |                   |                   |                   |               |
| Multivariate HR [95% CI]    | 1.00 (reference) | 0.81 [0.61, 1.07] | 1.22 [0.96, 1.55] | 0.88 [0.56, 1.37] | 0.82 [0.63, 1.08] | 0.37          |
| <b>Apple juice</b>          |                  |                   |                   |                   |                   |               |
| Multivariate HR [95% CI]*   | 1.00 (reference) | 0.84 [0.67, 1.06] | 1.22 [0.94, 1.57] | 0.64 [0.28, 1.44] | 0.64 [0.32, 1.29] | 0.54          |
| <b>Grapefruit juice</b>     |                  |                   |                   |                   |                   |               |
| Multivariate HR [95% CI]*   | 1.00 (reference) | 0.90 [0.71, 1.15] | 0.96 [0.74, 1.25] | 0.98 [0.59, 1.65] | 1.52 [1.10, 2.10] | 0.06          |
| <b>Orange juice</b>         |                  |                   |                   |                   |                   |               |
| Multivariate HR [95% CI]*   | 1.00 (reference) | 0.81 [0.67, 0.99] | 0.93 [0.79, 1.09] | 0.98 [0.78, 1.24] | 0.85 [0.72, 0.99] | 0.13          |
| <b>Tomato juice</b>         |                  |                   |                   |                   |                   |               |
| Multivariate HR [95% CI]*   | 1.00 (reference) | 1.06 [0.87, 1.29] | 1.11 [0.83, 1.47] | 1.18 [0.61, 2.29] | 0.66 [0.31, 1.40] | 0.94          |
| <b>Other juice</b>          |                  |                   |                   |                   |                   |               |
| Multivariate HR [95% CI]*   | 1.00 (reference) | 1.23 [1.02, 1.48] | 1.32 [1.09, 1.59] | 1.13 [0.78, 1.62] | 1.10 [0.84, 1.45] | 0.11          |
| <b>Punch</b>                |                  |                   |                   |                   |                   |               |
| Multivariate HR [95% CI]    | 1.00 (reference) | 1.08 [0.89, 1.31] | 1.00 [0.80, 1.24] | 1.05 [0.71, 1.56] | 0.97 [0.72, 1.30] | 0.96          |

|                            |                  |                   |                   |                   |                   |        |
|----------------------------|------------------|-------------------|-------------------|-------------------|-------------------|--------|
| <b>Whole milk</b>          |                  |                   |                   |                   |                   |        |
| Multivariate HR [95% CI]** | 1.00 (reference) | 1.28 [0.96, 1.71] | 0.72 [0.51, 1.01] | 0.69 [0.35, 1.33] | 1.09 [0.81, 1.46] | 0.46   |
| <b>Skim milk</b>           |                  |                   |                   |                   |                   |        |
| Multivariate HR [95% CI]** | 1.00 (reference) | 1.16 [0.91, 1.47] | 0.99 [0.84, 1.18] | 0.87 [0.69, 1.10] | 0.79 [0.68, 0.91] | <0.001 |
| <b>Water</b>               |                  |                   |                   |                   |                   |        |
| Multivariate HR [95% CI]   | 1.00 (reference) | 0.92 [0.62, 1.38] | 0.89 [0.65, 1.22] | 0.93 [0.66, 1.31] | 0.91 [0.74, 1.10] | 0.59   |

Model adjusted for age, race, region of residence, BMI, use of furosemide, use of thiazides, high blood pressure, diabetes, gout, intake of calcium, potassium, phytate, animal protein, vitamin C, total calories and mutually adjusted for all the beverages. \*No adjustment for potassium. \*\*No adjustment for calcium.

### C. Nurses' Health Study II

|                             | <1/week          | 1/week            | 2-4/week          | 5-6/week          | ≥1/day            | p-value trend |
|-----------------------------|------------------|-------------------|-------------------|-------------------|-------------------|---------------|
| <b>Regular cola</b>         |                  |                   |                   |                   |                   |               |
| Multivariate HR [95% CI]    | 1.00 (reference) | 1.25 [1.07, 1.46] | 1.15 [0.96, 1.38] | 1.39 [1.04, 1.84] | 1.26 [1.04, 1.52] | 0.01          |
| <b>Diet cola</b>            |                  |                   |                   |                   |                   |               |
| Multivariate HR [95% CI]    | 1.00 (reference) | 0.85 [0.71, 1.03] | 1.00 [0.84, 1.17] | 0.96 [0.75, 1.23] | 0.88 [0.77, 1.01] | 0.02          |
| <b>Regular non-cola</b>     |                  |                   |                   |                   |                   |               |
| Multivariate HR [95% CI]    | 1.00 (reference) | 1.18 [0.99, 1.41] | 0.90 [0.69, 1.16] | 1.09 [0.67, 1.78] | 1.57 [1.17, 2.11] | 0.02          |
| <b>Diet non-cola</b>        |                  |                   |                   |                   |                   |               |
| Multivariate HR [95% CI]    | 1.00 (reference) | 1.08 [0.90, 1.29] | 1.03 [0.84, 1.26] | 1.31 [0.95, 1.79] | 1.01 [0.81, 1.26] | 0.73          |
| <b>Coffee</b>               |                  |                   |                   |                   |                   |               |
| Multivariate HR [95% CI]    | 1.00 (reference) | 1.10 [0.86, 1.41] | 1.03 [0.84, 1.26] | 1.06 [0.82, 1.36] | 0.71 [0.64, 0.79] | <0.001        |
| <b>Decaffeinated coffee</b> |                  |                   |                   |                   |                   |               |
| Multivariate HR [95% CI]    | 1.00 (reference) | 1.13 [0.92, 1.39] | 0.78 [0.62, 0.99] | 0.67 [0.44, 1.00] | 0.84 [0.72, 0.98] | 0.003         |
| <b>Tea</b>                  |                  |                   |                   |                   |                   |               |
| Multivariate HR [95% CI]    | 1.00 (reference) | 0.98 [0.83, 1.15] | 0.93 [0.79, 1.09] | 1.10 [0.88, 1.37] | 0.93 [0.82, 1.04] | 0.20          |
| <b>Red wine</b>             |                  |                   |                   |                   |                   |               |
| Multivariate HR [95% CI]    | 1.00 (reference) | 0.84 [0.65, 1.10] | 0.97 [0.72, 1.29] | 0.83 [0.42, 1.60] | 0.75 [0.38, 1.44] | 0.25          |
| <b>White wine</b>           |                  |                   |                   |                   |                   |               |
| Multivariate HR [95% CI]    | 1.00 (reference) | 0.97 [0.79, 1.20] | 1.03 [0.82, 1.30] | 0.77 [0.45, 1.31] | 0.50 [0.28, 0.89] | 0.02          |
| <b>Beer</b>                 |                  |                   |                   |                   |                   |               |
| Multivariate HR [95% CI]    | 1.00 (reference) | 0.80 [0.62, 1.04] | 0.59 [0.40, 0.87] | 1.30 [0.75, 2.25] | 0.81 [0.42, 1.57] | 0.19          |
| <b>Liquor</b>               |                  |                   |                   |                   |                   |               |
| Multivariate HR [95% CI]    | 1.00 (reference) | 0.83 [0.63, 1.09] | 1.05 [0.77, 1.44] | 0.67 [0.30, 1.50] | 0.82 [0.45, 1.48] | 0.31          |
| <b>Apple juice</b>          |                  |                   |                   |                   |                   |               |
| Multivariate HR [95% CI]*   | 1.00 (reference) | 1.02 [0.88, 1.19] | 0.92 [0.74, 1.13] | 1.45 [0.98, 2.14] | 0.89 [0.55, 1.45] | 0.61          |
| <b>Grapefruit juice</b>     |                  |                   |                   |                   |                   |               |
| Multivariate HR [95% CI]*   | 1.00 (reference) | 1.16 [0.93, 1.43] | 1.18 [0.91, 1.54] | 0.88 [0.48, 1.59] | 1.19 [0.76, 1.88] | 0.26          |
| <b>Orange juice</b>         |                  |                   |                   |                   |                   |               |
| Multivariate HR [95% CI]*   | 1.00 (reference) | 0.95 [0.83, 1.09] | 0.91 [0.79, 1.05] | 0.93 [0.74, 1.15] | 0.95 [0.81, 1.12] | 0.51          |
| <b>Tomato juice</b>         |                  |                   |                   |                   |                   |               |
| Multivariate HR [95% CI]*   | 1.00 (reference) | 1.32 [1.09, 1.59] | 1.34 [1.00, 1.79] | 0.65 [0.24, 1.75] | 1.89 [1.06, 3.37] | 0.01          |
| <b>Other juice</b>          |                  |                   |                   |                   |                   |               |
| Multivariate HR [95% CI]*   | 1.00 (reference) | 1.19 [1.04, 1.37] | 1.16 [1.00, 1.36] | 1.02 [0.77, 1.34] | 1.00 [0.80, 1.26] | 0.59          |
| <b>Punch</b>                |                  |                   |                   |                   |                   |               |
| Multivariate HR [95% CI]    | 1.00 (reference) | 1.14 [0.99, 1.32] | 1.16 [0.99, 1.35] | 1.21 [0.94, 1.55] | 1.26 [1.05, 1.53] | 0.004         |

|                            |                  |                   |                   |                   |                    |      |
|----------------------------|------------------|-------------------|-------------------|-------------------|--------------------|------|
| <b>Whole milk</b>          |                  |                   |                   |                   |                    |      |
| Multivariate HR [95% CI]** | 1.00 (reference) | 0.92 [0.68, 1.25] | 1.03 [0.76, 1.39] | 0.81 [0.41, 1.57] | 0.92 [0.65, 1.30]  | 0.62 |
| <b>Skim milk</b>           |                  |                   |                   |                   |                    |      |
| Multivariate HR [95% CI]** | 1.00 (reference) | 0.86 [0.69, 1.07] | 0.97 [0.83, 1.12] | 0.91 [0.73, 1.12] | 1.00 [0.88 [1.14]] | 0.98 |
| <b>Water</b>               |                  |                   |                   |                   |                    |      |
| Multivariate HR [95% CI]   | 1.00 (reference) | 0.83 [0.62, 1.10] | 0.98 [0.79, 1.22] | 0.84 [0.65, 1.08] | 0.85 [0.74, 0.98]  | 0.04 |

Model adjusted for age, race, region of residence, BMI, use of furosemide, use of thiazides, high blood pressure, diabetes, gout, intake of calcium, potassium, phytate, animal protein, vitamin C, total calories and mutually adjusted for all the beverages. \*No adjustment for potassium. \*\*No adjustment for calcium.
